# Supplementary material
Source: PubMed Central journal article supplement (PMC7176049)

## **Supplemental Online Content**

**Supplemental Table 1.** Genes used in Inflammatory, EMT, and IPRES signatures

**Supplemental Table 2.** EMT Gene Lists from the Literature

**Supplemental Figure 1:** PD-L1 gene expression and response

**Supplemental Figure 2:** Comparison of markers of T cells and Macrophages with response

**Supplemental Figure 3:** Innate PD-1 resistance score (IPRES) and chronic IFN activation score and response

**Supplemental Figure 4:** Markers of TGF $\beta$  signaling and response

**Supplemental Table 1. Genes used in Inflammatory, EMT, and IPRES signatures**

| <b>Inflammatory Genes</b> | <b>EMT Genes</b>   | <b>IPRES Genes</b> |
|---------------------------|--------------------|--------------------|
| CCL5                      | <b>Epithelial</b>  | ANGPT2             |
| CCR5                      | CDH1               | AXL                |
| CD274 (PDL1)              | CDH3               | CCL13              |
| CD3D                      | CLDN4              | CCL2               |
| CD3E                      | EPCAM              | CCL7               |
| CD8A                      | ST14               | CDH1               |
| CIITA                     | MAL2               | FAP                |
| CTLA4                     |                    | FLT1               |
| CXCL10                    | <b>Mesenchymal</b> | 1L10               |
| CXCL11                    | VIM                | LOXL2              |
| CXCL13                    | SNAI2              | RORS               |
| CXCL9                     | ZEB2               | TAGLN              |
| GZMA                      | FN1                | TWIST2             |
| GZMB                      | MMP2               | VEGFA              |
| HLA-DRA                   | AGER               | VEGFC              |
| HKA.DRB1                  |                    | WNT5A              |
| HLA-E                     |                    |                    |
| IDO1                      |                    |                    |
| IL2RG                     |                    |                    |
| ITGAL                     |                    |                    |
| LAG3                      |                    |                    |
| NKG7                      |                    |                    |
| PDCD1                     |                    |                    |
| PRF1                      |                    |                    |
| PTPRC                     |                    |                    |
| STAT1                     |                    |                    |
| TAGAP                     |                    |                    |

**Supplemental Table 2. EMT Gene Lists from the Literature**

| Genes              | Ref 1<br>(lung) | Ref 2<br>(lung) | Ref 3<br>(lung) | Ref 4<br>(lung) | Ref 5<br>(lung) | Ref 6<br>(pan<br>tumor) | Ref 7<br>EMT<br>database | Ref 8<br>(breast) | Avg<br>gene<br>reads | Notes |
|--------------------|-----------------|-----------------|-----------------|-----------------|-----------------|-------------------------|--------------------------|-------------------|----------------------|-------|
| <b>Epithelial</b>  |                 |                 |                 |                 |                 |                         |                          |                   |                      |       |
| CDH1               | X               | X               | X               | X               | X               | x                       | X                        | X                 | 45                   |       |
| CDH3               |                 | X               | X               | X               |                 | x                       |                          |                   | 136                  |       |
| CLDN4              |                 |                 |                 | X               |                 |                         | X                        | X                 | 127                  |       |
| EPCAM              |                 | X               | X               | X               |                 | x                       | X                        |                   | 158                  |       |
| ST14               |                 | X               | X               | X               |                 | x                       |                          |                   | 202                  |       |
| MAL2               |                 |                 | X               |                 |                 | x                       |                          |                   | 155                  |       |
|                    |                 |                 |                 |                 |                 |                         |                          |                   |                      |       |
|                    |                 |                 |                 |                 |                 |                         |                          |                   |                      |       |
| <b>Mesenchymal</b> |                 |                 |                 |                 |                 |                         |                          |                   |                      |       |
| VIM                | X               | X               | X               | X               |                 | x                       | X                        | X                 | 326                  |       |
| SNAI2              | X               | X               |                 | X               | X               |                         | X                        | X                 | 39                   |       |
| ZEB2               |                 | X               |                 | X               | X               |                         | X                        | X                 | 34                   |       |
| FN1                | X               |                 | X               |                 |                 |                         |                          |                   | 71                   |       |
| MMP2               | X               |                 | X               |                 |                 |                         | X                        |                   | 265                  |       |
| AGER               |                 |                 |                 | X               |                 |                         | X                        |                   | 33                   |       |
|                    |                 |                 |                 |                 |                 |                         |                          |                   |                      |       |
| SNAI1              | X               |                 |                 |                 | X               |                         | X                        | X                 | 9                    | 1     |
| TWIST1             | X               | X               |                 | X               | X               |                         |                          | X                 | 9                    | 1     |
| ZEB1               |                 | X               | X               | X               | X               | x                       | X                        | X                 | 8                    | 1     |
| FOXC1              |                 |                 |                 |                 |                 |                         | X                        | X                 | 5                    | 1     |
| TWIST2             |                 | X               |                 |                 | X               |                         |                          | X                 | 2                    | 1     |
| CDH2               | X               |                 |                 | X               | X               |                         |                          | X                 | 2                    | 1     |
|                    |                 |                 |                 |                 |                 |                         |                          |                   |                      |       |

Notes.

1. Classic EMT gene, but expression level too low so not used

**References:**

Reference 1. Chae YK, Chang S, Ko T, et al: Epithelial-mesenchymal transition (EMT) signature is inversely associated with T-cell infiltration in non-small cell lung cancer (NSCLC). *Sci Rep* 8:2918, 2018

Reference 2. Schliekelman MJ, Tagiuchi A, Zhu J, et al. Molecular portraits of epithelial, mesenchymal and hybrid states in lung adenocarcinoma and their relevance to survival. *Cancer Res.* 75: 1789–1800, 2015.

Reference 3. Byers LA, Diao LX, Wang J, et al: An Epithelial-Mesenchymal Transition Gene Signature Predicts Resistance to EGFR and PI3K Inhibitors and Identifies Axl as a Therapeutic Target for Overcoming EGFR Inhibitor Resistance. *Clinical Cancer Research* 19:279-290, 2013

Reference 4. Tan ZT, Miow QH, Miki Y, et al. Epithelial-mesenchymal transition spectrum quantification and its efficacy in deciphering survival and drug responses of cancer patients. *EMBO Mol Med* 6: 1279–1293, 2014

Reference 5. Kuner R, Muley T, Meister M, et al: Global gene expression analysis reveals specific patterns of cell junctions in non-small cell lung cancer subtypes. *Lung Cancer* 63:32-38, 2009

Reference 6. Huang RY-J, Wong MK, Tan TZ, et al. An EMT spectrum defines an anoikis-resistant and spheroidogenic intermediate mesenchymal state that is sensitive to e-cadherin restoration by a src-kinase inhibitor, saracatinib (AZD0530)/ Cell Death and Disease (2013) 4, e915; 2013

Reference 7. Zhao M., Kong L, Liu Y. Qu, H. dbEMT: a literature-based resource for Epithelial-Mesenchymal Transition genes. Sci Rep. 11459. 2015: <http://dbemt.bioinfo-minzhao.org/index.html>

Reference 8. Taube JH, Herschkowitz JI, Komurov K, et al. Core epithelial-to-mesenchymal transition interactome gene-expression signature is associated with claudin-low and metaplastic breast cancer subtypes. Proc. Nat. Acad. Sci. 107:15449-15454, 2010.

**Supplemental Figure 1: PD-L1 gene expression and response.** (A) Number of counts of PD-L1 gene expression levels in responders and PD patients. (B) log<sub>2</sub> z-scores of PD-L1 gene expression levels in responders and PD patients.

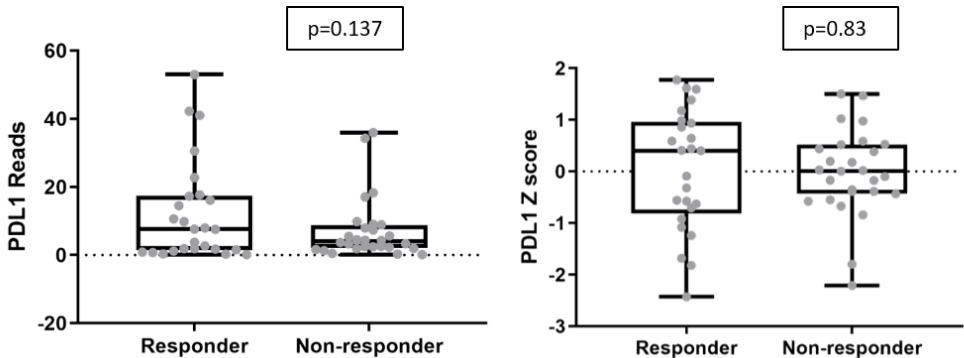

**Supplemental Figure 2: Comparison of markers of T cells and Macrophages with response.** (A) Expression levels (number of reads) of established macrophage associated genes (CD68, CD14, CD163, CSF1R) in responders and PD patients. (B) Expression levels of established T cell associated genes (CD4, CD8A, CD8B) in responders and PD patients.

### A. Macrophage Genes

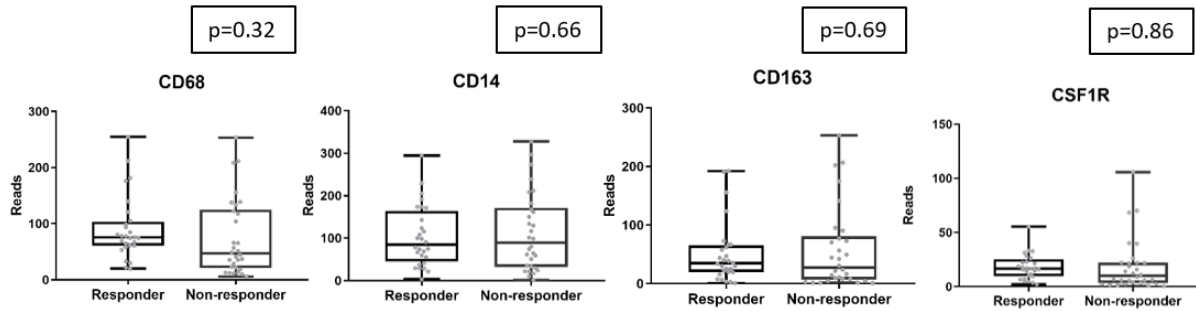

### B. T Cell Genes

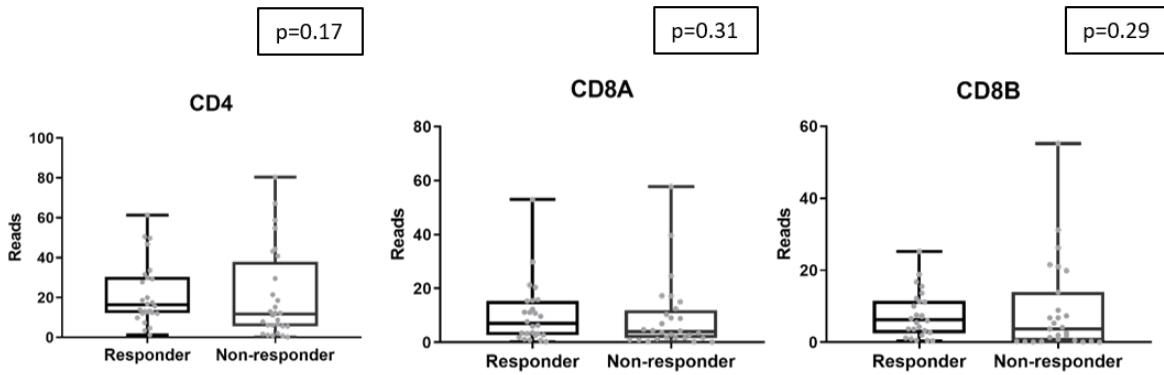

**Supplemental Figure 3: Innate PD-1 resistance score (IPRES) and chronic IFN activation score and response.**

(A) Comparison of the log<sub>2</sub> z-scores of the IPRES signature in responders and non-responders. The IPRES score was calculated with and without expression levels of CH1 (E-cadherin). (B) Comparison of a chronic interferon activation score in responders and non-responders. This score included 9 established genes involved in chronic interferon activation (STAT1, IFI44, IFIT1, IFIT3, OAS1, OAS2, MX1, IRF7, and ISG15).

A.

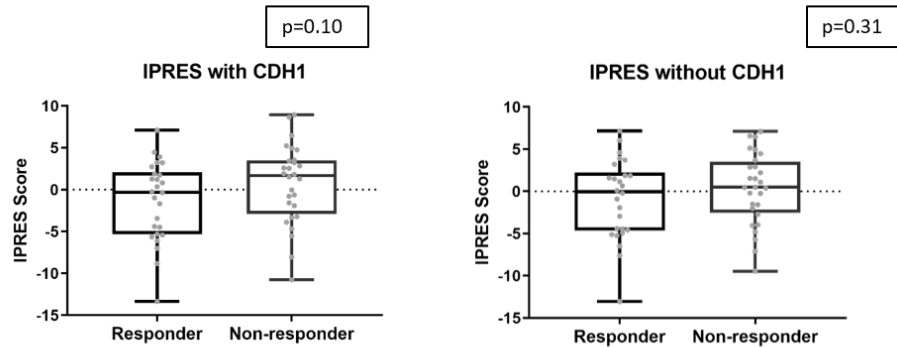

B.

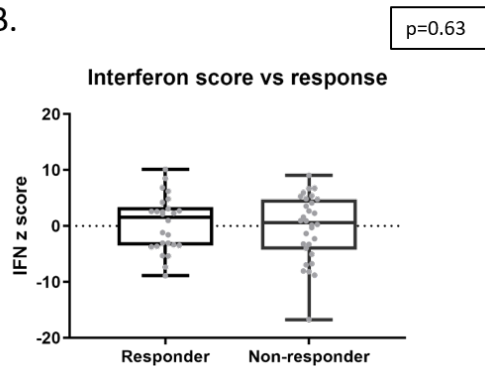

**Supplemental Figure 4. Markers of TGF $\beta$  signaling and response.** Expression levels (reads) of 5 established genes involved in TGF $\beta$  signaling (TGFB1, TGFBR2, ACTA2, COL4A2, and TAGLN) in responders and non-responders.

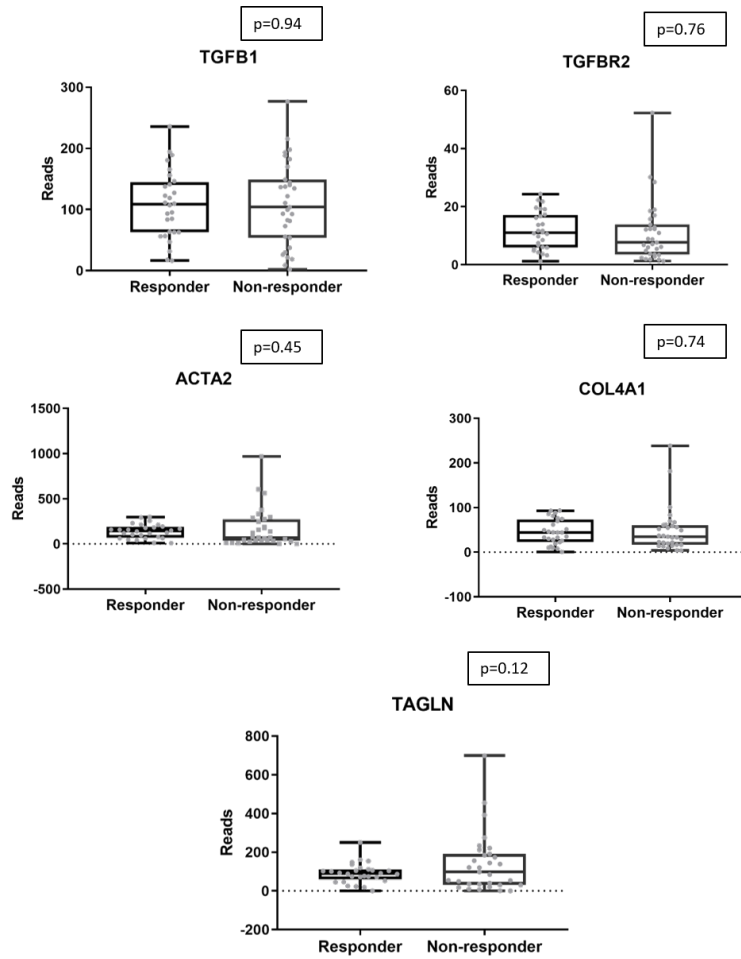

Supplement: NIHMS1544555-supplement-1.pdf [file NIHMS1544555-supplement-1.pdf]
